# Supplementary material for: Development of a Soft Sensor Using Machine Learning Algorithms for Predicting the Water Quality of an Onsite Wastewater Treatment System
Source: PubMed Central journal article supplement (PMC10515708; doi:10.1021/acsenvironau.2c00072), 2023-06-30
Supplement: vg2c00072_si_002.pdf [file vg2c00072_si_002.pdf]

1 **A. Supplementary Information: Development of a soft sensor**  
2 **using machine learning algorithms for predicting the water**  
3 **quality of an onsite wastewater treatment system**

4 Hsiang-Yang Shyu †, Cynthia J. Castro †, Robert A. Bair †, Qing Lu †, Daniel H. Yeh †, \*

5 † University of South Florida, Civil & Environmental Engineering, 4202 E. Fowler Ave.,  
6 Tampa, FL 33620, United States

7 \*Corresponding Author ([dhyeh@usf.edu](mailto:dhyeh@usf.edu))

8

9           **A.1.       Comparison of k-fold cross-validation with RMSE**

10   This section compares root mean square error (RMSE) values across different values of k  
11   to determine the optimal k for a k-fold cross-validation when training the model. K-fold  
12   cross-validation is a widely used technique for model selection and performance  
13   evaluation in ML algorithms. It involves dividing the dataset into k subsets of equal size,  
14   with k-1 subsets used for training the model and one subset for testing it. This process is  
15   repeated k times, with each subset used once for testing, while the final performance  
16   metric is calculated as the average of the RMSE values obtained from the k-testing sets.  
17   The "repeatedcv" function with k=3, 5, 10, 15, and 20, and 3 repeats, as implemented in  
18   the R caret package, was utilized in this study<sup>1</sup>. This specific cross-validation method  
19   aims to provide a robust estimation of model performance by repeating the k-fold cross-  
20   validation process multiple times. It helps to reduce the impact of randomness in the  
21   partitioning of data into folds and ensures the validity and generalizability of the results.

22   Figure S1 shows that increasing k leads to lower RMSE. This signifies that the dataset  
23   will have better model performance with increased k values. Larger k values allow each  
24   fold to contain a smaller portion of the dataset, resulting in more data used for training.  
25   However, the reduction in RMSE decreases at higher k values, indicating diminishing  
26   value of using higher k values. For predicting COD, the average RMSE decreased by  
27   3.26%, 5.53%, 2.25%, and 1.25% between k=3, 5, 10, 15, and 20, respectively. The  
28   average RMSE in predicting TSS decreased by 0.51%, 11.89%, 7.91%, and 5.74%, while  
29   the average RMSE in predicting *E. coli* decreased by 17.25%, 11.70%, 6.43%, and  
30   4.39%, respectively. Considering the cost of increased computational time, which

31 increases by 1.5 times between 15 to 20-fold, and the slowdown in the downward trend  
 32 of RMSE with k, a 15-fold cross-validation was chosen for this study.

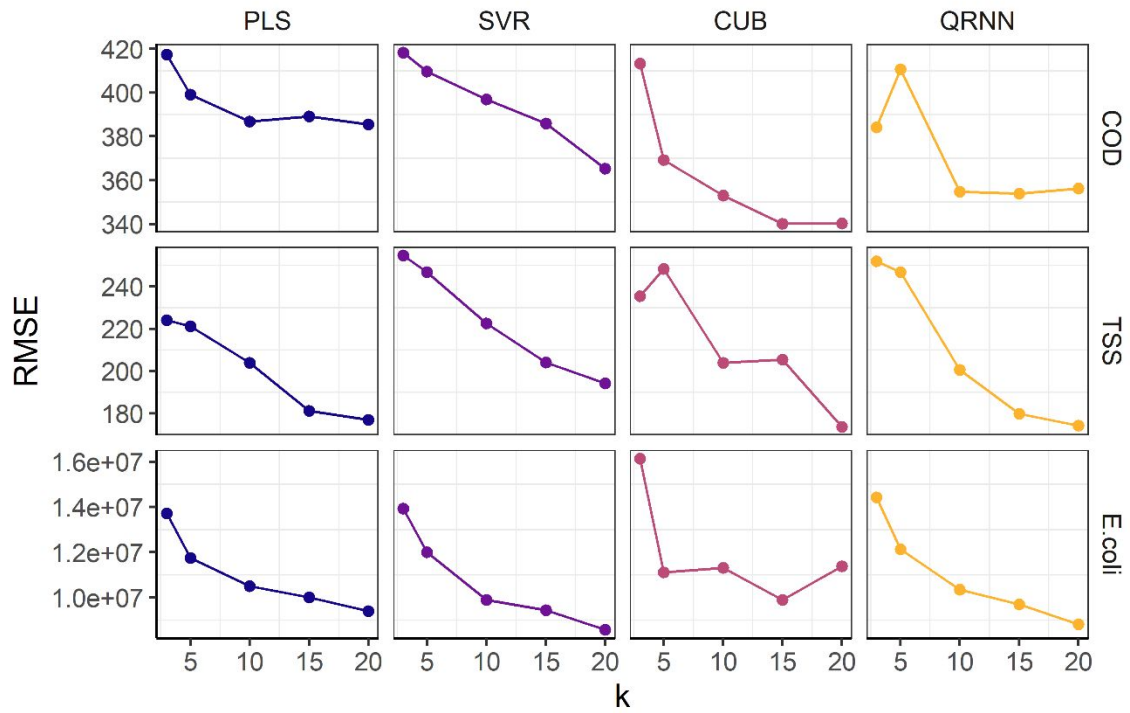

33  
 34 *Figure S1: Comparison of k-fold cross-validation with RMSE was performed for three*  
 35 *output variables (COD, TSS, and E. coli) using four ML algorithms (PLS, SVR, CUB, and*  
 36 *QRNN) trained using the training dataset.*

## 37        **A.2.        Z-score analysis**

38        This section utilizes the z-score analysis to identify the non-steady state performance of  
39        the system and eliminate outliers from the dataset. Three significant restart events  
40        occurred during the field trial, resulting in abnormal spikes in various water quality  
41        parameters. These events include the December 2018 summer vacation shutdown, the  
42        August 2019 nutrient capture system (NCS) maintenance, and the December 2019  
43        shutdown with NCS maintenance in January 2020. The daily z-score was calculated by  
44        averaging the z-score values of individual water quality parameters, including COD, TSS,  
45        *E. coli*, turbidity, color, pH,  $NH_4^+$ ,  $NO_3^-$ , and electrical conductivity (EC). A daily z-  
46        score value greater than two times the standard deviation was considered non-steady state  
47        performance. The results of the z-score analysis, presented in Figure S2, indicate that the  
48        NCS maintenance events significantly impacted the water quality parameters.  
49        Additionally, Figure S2 shows that the abnormal spikes in the z-score caused by the NCS  
50        maintenance events returned to steady state operations after two weeks. As a result, two  
51        weeks of data following system disruptions and maintenance events were eliminated  
52        from the training set to reduce noise.

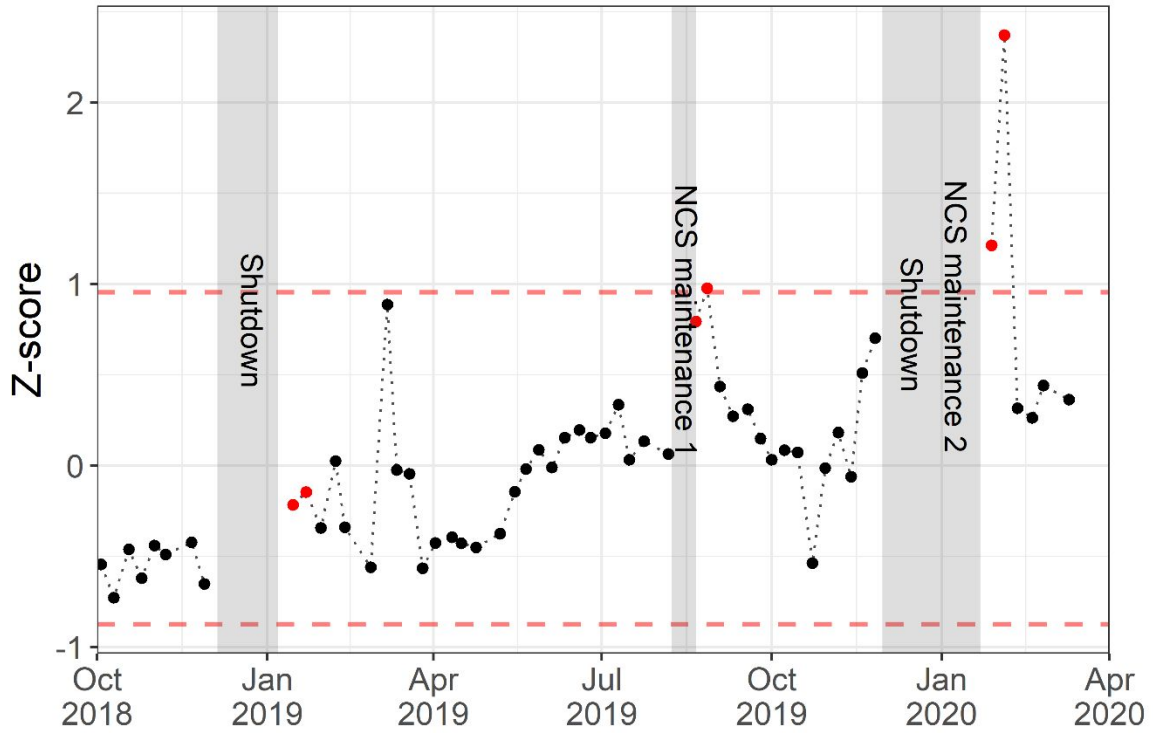

53

54 *Figure S2: Z-score analysis for the water quality. The dots represent the daily mean z-*  
 55 *score of the water quality parameters, while the red dots indicate the data points*  
 56 *occurring after restart or maintenance events. The red dashed line represents the two*  
 57 *standard deviations from the mean.*

58 **A.3. Characteristics of Sampled Wastewater**

59 *Table S1: Physical/chemical characteristics of sampled wastewater during the field for five sampling points in NG (n =56).*

| Sampling point                    | Parameters                        | Mean               | Standard deviation | Min                | Max                | Range              |
|-----------------------------------|-----------------------------------|--------------------|--------------------|--------------------|--------------------|--------------------|
| Influent                          | COD (mg/L)                        | 2,420              | 967.25             | 1,051              | 5,820              | 4,769              |
|                                   | SCOD (mg/L)                       | 1,310              | 530.75             | 460.00             | 2,885              | 2,425              |
|                                   | TSS (mg/L)                        | 653                | 391.85             | 38                 | 1,975              | 1,937              |
|                                   | <i>E. coli</i> (MPN/100mL)        | $9.96 \times 10^6$ | $2.49 \times 10^7$ | $2.41 \times 10^3$ | $1.54 \times 10^8$ | $1.53 \times 10^8$ |
|                                   | Color (Pt/Co)                     | 1,908              | 1,104.95           | 45                 | 4,955              | 4,910              |
|                                   | Turbidity (NTU)                   | 967                | 611.95             | 402                | 4,480              | 4,078              |
|                                   | Conductivity ( $\mu\text{s/cm}$ ) | 2,404              | 847.65             | 502                | 3,880              | 3,378              |
|                                   | pH                                | 6.75               | 0.52               | 5.57               | 8.90               | 3.34               |
|                                   | $\text{NH}_4^+$ (mg/L)            | 218                | 100.60             | 11                 | 480                | 469                |
|                                   | $\text{NO}_3^-$ (mg/L)            | 2                  | 1.14               | 0.5                | 5.7                | 5.2                |
|                                   | Temperature ( $^\circ\text{C}$ )  | 23.28              | 2.49               | 18.94              | 28.24              | 9.30               |
|                                   | AnMBR                             | COD (mg/L)         | 3,244              | 1,897.96           | 533                | 7,855              |
| SCOD (mg/L)                       |                                   | 1,949.57           | 1,528              | 322.50             | 7,015              | 6,693              |
| TSS (mg/L)                        |                                   | 873                | 729.94             | 325                | 3,525              | 3,225              |
| <i>E. coli</i> (MPN/100mL)        |                                   | $4.94 \times 10^6$ | $9.24 \times 10^6$ | $1.84 \times 10^7$ | $4.84 \times 10^7$ | $3 \times 10^7$    |
| Color (Pt/Co)                     |                                   | 3,944              | 6,970.78           | 98                 | 49,600             | 49,502             |
| Turbidity (NTU)                   |                                   | 1,731              | 1,130.37           | 315                | 4,385              | 4,069              |
| Conductivity ( $\mu\text{s/cm}$ ) |                                   | 2,793              | 863.75             | 1,273              | 4,735              | 3,462              |
| pH                                |                                   | 6.98               | 0.53               | 6.09               | 9.68               | 3.58               |
| $\text{NH}_4^+$ (mg/L)            |                                   | 225                | 93.18              | 10.00              | 480                | 470                |
| $\text{NO}_3^-$ (mg/L)            |                                   | 4                  | 2.61               | 0.5                | 10.5               | 10                 |
| Temperature ( $^\circ\text{C}$ )  |                                   | 23.59              | 2.44               | 18.90              | 28.94              | 10.05              |
| Permeate                          |                                   | COD (mg/L)         | 37.61              | 224.90             | 205                | 1,600              |
|                                   | SCOD (mg/L)                       | 312.54             | 125.99             | 58                 | 924                | 866                |
|                                   | TSS (mg/L)                        | 9.68               | 23.32              | 1                  | 147                | 146                |
|                                   | <i>E. coli</i> (MPN/100mL)        | 452                | 1,840.83           | <2.2               | 12,098             | 12,098             |
|                                   | Color (Pt/Co)                     | 778.88             | 764.56             | 10                 | 3,580              | 3,570              |
|                                   | Turbidity (NTU)                   | 188.04             | 105.14             | 6.89               | 579                | 572.11             |
|                                   | Conductivity ( $\mu\text{s/cm}$ ) | 2,769.57           | 866.50             | 1,170              | 4,810              | 3,640              |
| pH                                | 7.07                              | 0.66               | 6.09               | 11.07              | 4.99               |                    |

|          |                            |          |          |      |        |        |
|----------|----------------------------|----------|----------|------|--------|--------|
|          | $NH_4^+$ (mg/L)            | 249.52   | 112.89   | 10   | 518    | 508    |
|          | $NO_3^-$ (mg/L)            | 1.57     | 0.93     | 0.5  | 4.5    | 4      |
|          | COD (mg/L)                 | 127.48   | 87.34    | 0.5  | 352.50 | 352    |
|          | SCOD (mg/L)                | 119.83   | 85.87    | 0.5  | 352.50 | 352    |
|          | TSS (mg/L)                 | 12.08    | 19.12    | 0.5  | 120.50 | 120    |
|          | <i>E. coli</i> (MPN/100mL) | 0.15     | 0.57     | <2.2 | 3      | 3      |
| Post-NCS | Color (Pt/Co)              | 246.12   | 381.42   | 0    | 2,500  | 2,500  |
|          | Turbidity (NTU)            | 50.49    | 101.95   | 0.41 | 708    | 707.59 |
|          | Conductivity ( $\mu$ s/cm) | 2,476    | 1,053.17 | 689  | 5,065  | 4,376  |
|          | pH                         | 7.49     | 0.90     | 6.11 | 11.36  | 5.25   |
|          | $NH_4^+$ (mg/L)            | 68.42    | 86.31    | 0.5  | 272.50 | 272    |
|          | $NO_3^-$ (mg/L)            | 0.96     | 0.81     | 0.5  | 3.7    | 3.2    |
|          | COD (mg/L)                 | 117.74   | 90.80    | 0.5  | 366.50 | 366    |
|          | SCOD (mg/L)                | 110.34   | 90.13    | 0.5  | 366.50 | 366    |
|          | TSS (mg/L)                 | 10.25    | 10.17    | 0.5  | 56.67  | 56.17  |
|          | <i>E. coli</i> (MPN/100mL) | <2.2     | 0        | <2.2 | <2.2   | 0      |
| Effluent | Color (Pt/Co)              | 155.62   | 266.58   | 0    | 1,750  | 1,750  |
|          | Turbidity (NTU)            | 35.77    | 92.44    | 0.50 | 686    | 685.50 |
|          | Conductivity ( $\mu$ s/cm) | 2,531.83 | 1,115.74 | 457  | 5,330  | 4,873  |
|          | pH                         | 7.54     | 0.78     | 6.20 | 11.45  | 5.25   |
|          | $NH_4^+$ (mg/L)            | 66.21    | 86.65    | 0.5  | 274    | 273.5  |
|          | $NO_3^-$ (mg/L)            | 1.03     | 0.89     | 0.5  | 3.15   | 2.65   |

61 **A.4. Result of Recursive Feature Elimination Analysis**

62 To avoid bias when selecting the model input variables, the k-fold cross-validation was used in recursive feature elimination analysis  
 63 (RFE). In RFE, the training dataset is divided into  $k = 15$  subsets to reduce model overfitting when training. Figure S3 shows the  
 64 RMSE and deviation results of the RFE analysis. The group with the lowest average RMSE was selected to represent the best  
 65 selection of the variables for each model.

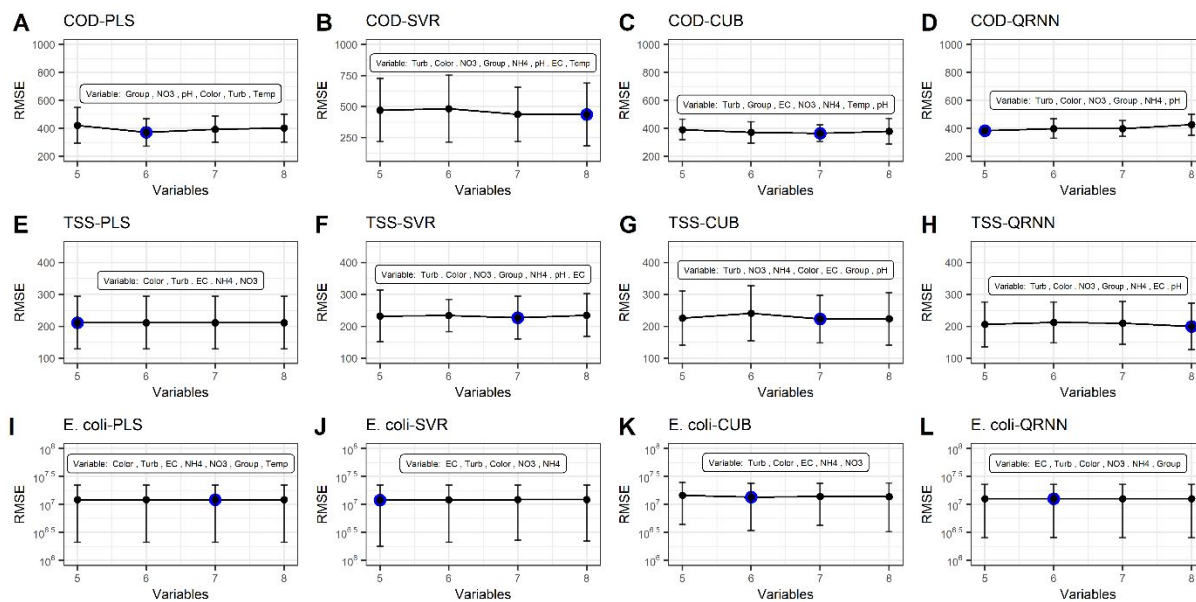

66  
 67 *Figure S3: Recursive feature elimination analysis results on COD, TSS, and E. coli. (A-D) PLS, SVR, CUB, and QRNN for COD; (E-*  
 68 *H) PLS, SVR, CUB, and QRNN for TSS; (I-L) PLS, SVR, CUB, and QRNN for E. coli. The blue point represents the lowest RMSE for*  
 69 *the output variables in each model.*



70 **A.5. Additional Model Description**

71 *Table S2: RMSE, R<sup>2</sup>, and MAPE computed on training and testing datasets for each*  
 72 *machine learning model.*

| Variable (Unit)            | Model structure | Training             |                | Testing              |                |          | Final hyperparameters             |
|----------------------------|-----------------|----------------------|----------------|----------------------|----------------|----------|-----------------------------------|
|                            |                 | RMSE                 | R <sup>2</sup> | RMSE                 | R <sup>2</sup> | MAPE (%) |                                   |
| COD (mg/L)                 | PLS             | 331                  | 0.93           | 358                  | 0.93           | 31.3     | ncomp = 5                         |
|                            | SVR             | 199                  | 0.98           | 270                  | 0.96           | 14.5     | sigma = 0.01;<br>cost = 5.5       |
|                            | CUB             | 132                  | 0.99           | 285                  | 0.96           | 20.4     | committees = 4;<br>neighbors = 3  |
|                            | QRNN            | 332                  | 0.93           | 284                  | 0.96           | 24.3     | n.hidden = 2;<br>penalty = 31.6   |
| TSS (mg/L)                 | PLS             | 168                  | 0.86           | 289                  | 0.67           | 56.7     | ncomp = 3                         |
|                            | SVR             | 79                   | 0.97           | 107                  | 0.95           | 24.1     | sigma = 0.05;<br>cost = 17.5      |
|                            | CUB             | 31                   | 0.99           | 54                   | 0.98           | 24.8     | committees = 9;<br>neighbors = 3  |
|                            | QRNN            | 156                  | 0.88           | 321                  | 0.61           | 46.9     | n.hidden = 2;<br>penalty = 57.2   |
| <i>E. coli</i> (MPN/100ml) | PLS             | 1.44×10 <sup>7</sup> | 0.12           | 1.44×10 <sup>7</sup> | 0.20           | 88.2     | ncomp = 1                         |
|                            | SVR             | 7.38×10 <sup>6</sup> | 0.91           | 7.38×10 <sup>7</sup> | 0.83           | 83.5     | sigma = 0.1;<br>cost = 1.5        |
|                            | CUB             | 7.96×10 <sup>6</sup> | 0.60           | 7.96×10 <sup>7</sup> | 0.22           | 71.4     | committees = 10;<br>neighbors = 9 |
|                            | QRNN            | 1.48×10 <sup>7</sup> | 0.10           | 1.48×10 <sup>7</sup> | 0.12           | 87.7     | n.hidden = 4;<br>penalty = 98.7   |

73

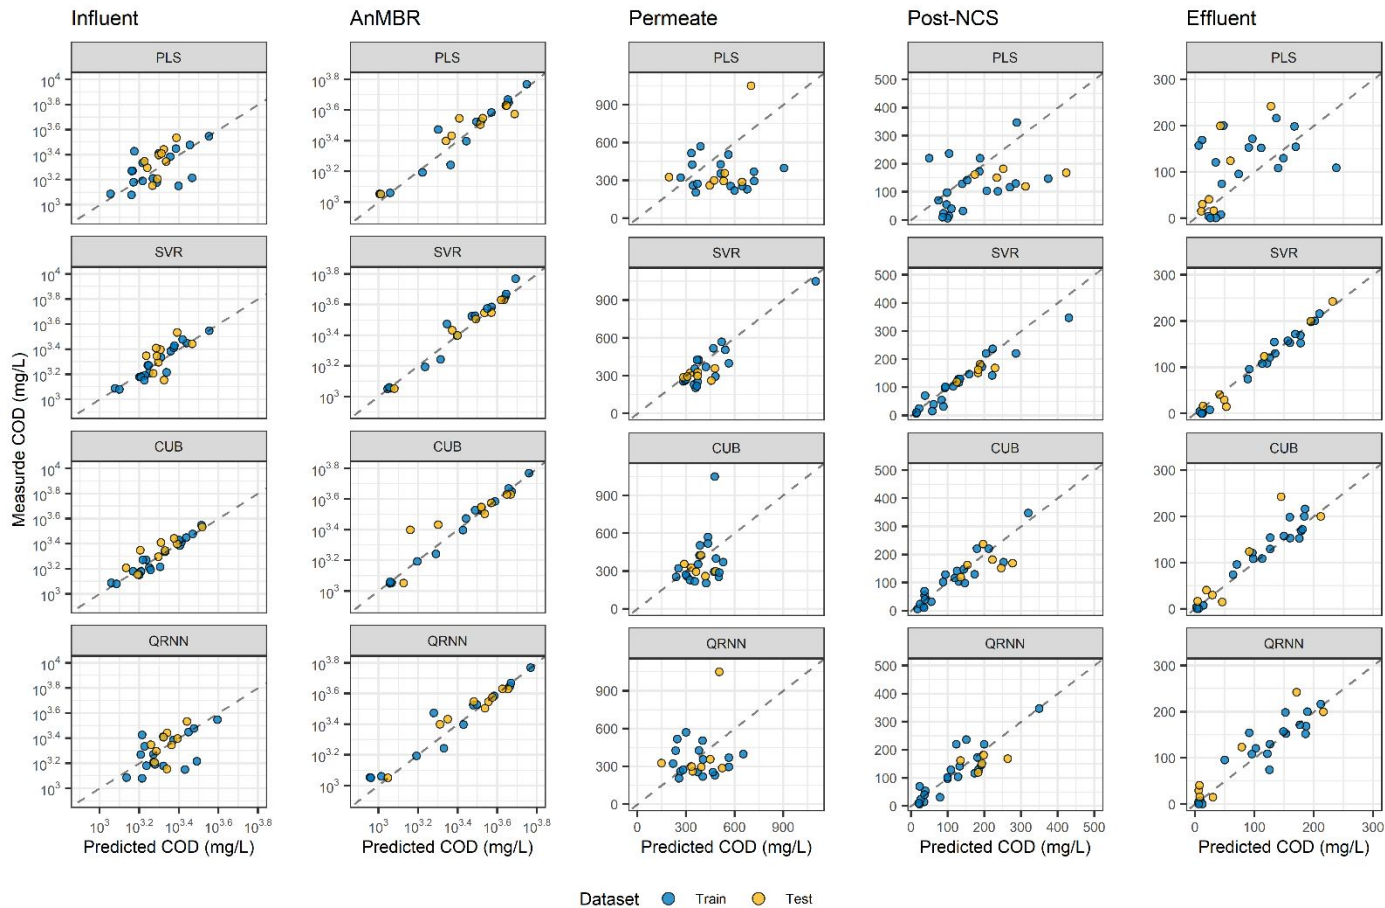

74

75 *Figure S4: Model predictions for COD in each sampling point. The circle and triangle data points represent the testing and training*  
 76 *datasets, respectively. The black dashed lines represent the line of equality ( $y = x$ ). The comparative evaluation among these models*  
 77 *showed that SVR had the best prediction performance for COD in the lower concentration sampling points (Permeate, Post-NCS, and*  
 78 *Effluent), while CUB had better prediction performance in the higher COD concentration range sampling points (Influent and*  
 79 *AnMBR).*

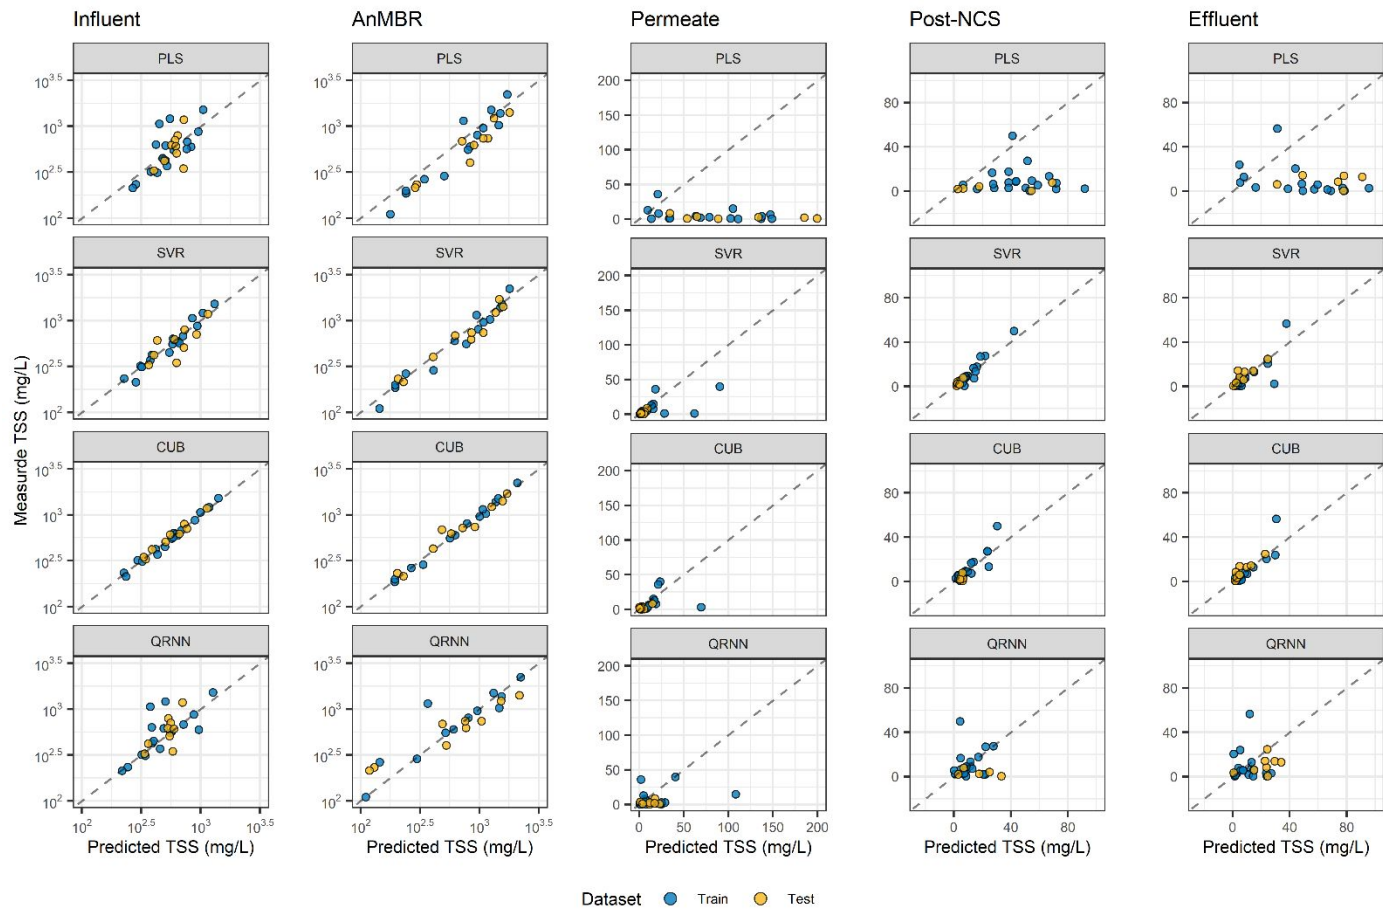

80

81 *Figure S5: Model predictions for TSS in each sampling point. The circle and triangle data points represent the testing and training*  
 82 *datasets, respectively. The black dashed lines represent the line of equality ( $y = x$ ). The comparative evaluation among these models*  
 83 *showed that CUB had the best prediction performance for TSS in the higher concentration range sampling points (Influent and*  
 84 *AnMBR), while after the membrane process, CUB and SVR both showed well prediction accuracy.*

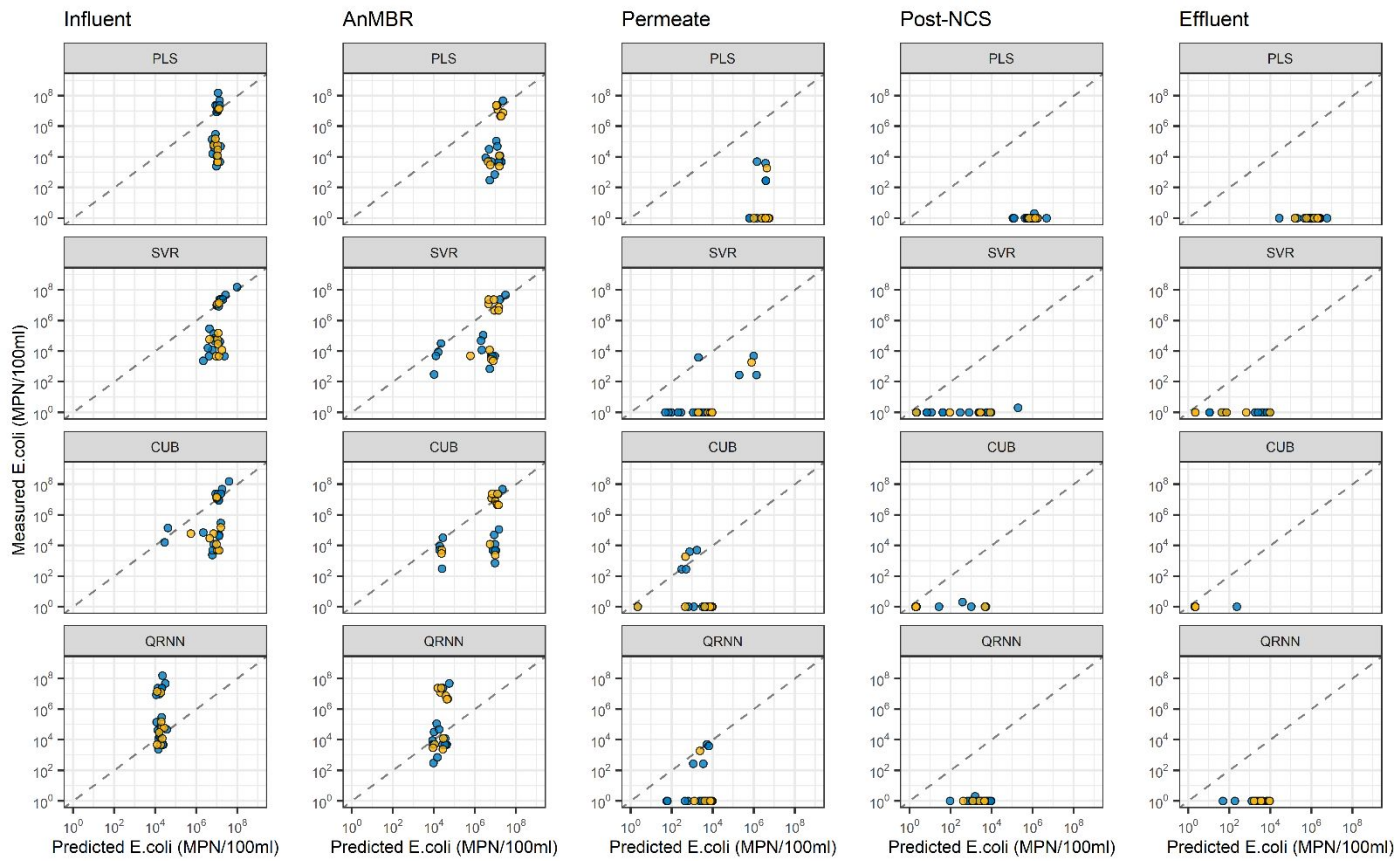

Dataset ● Train ● Test

85

86 *Figure S6: Model predictions for E. coli in each sampling point. The circle and triangle data points represent the testing and training*  
 87 *datasets, respectively. The black dashed lines represent the line of equality (y = x).*

## 88        **A.6.        *E. coli* Prediction Using Classification ML Algorithms**

89        Given the poor results of the ML regression models in predicting *E. coli* concentrations, a  
90        classification method that was better suited to the *E. coli* data was investigated. The *E.*  
91        *coli* concentration data was broken down into four ranges: a high (H) concentration range  
92        for concentrations  $> 10^7$  MPN/100mL; a medium (M) concentration range for  
93        concentrations  $\leq 10^7$  and  $> 10^2$  MPN/100mL; a low (L) concentration range for  
94        concentrations  $\leq 10^2$  and  $> 2.2$  MPN/100mL; and a final concentration range for  
95        concentrations lower than the detection limit (LDL).

96        Except for SVR, which is suitable for classification data using the support vector machine  
97        (SVM), the other models used for regression prediction were not well suited to  
98        classification prediction. In this section, SVM was used to predict the concentration range  
99        of *E. coli*, while the prediction accuracy of SVM was compared with two other popular  
100       classification algorithms, k-nearest neighbor (KNN) and random forest (RF). KNN  
101       (package: ‘knn’) is a non-parametric classification method that uses observed data points  
102       and their weights to simulate the final predicted result. To prevent the model from  
103       overfitting noisy data, this study optimized the hyperparameter k from 3. RF (package:  
104       ‘rf’) is a nonlinear, supervised learning method that comprises multiple independent  
105       decision tree classifiers where the final predicted result is based on aggregating all  
106       decision trees’ results. The hyperparameters for RF include the number of candidates  
107       considered at each decision tree (mtry) and the number of trees to grow in the set (ntree).  
108       To avoid overfitting the model to the training dataset, the same methodology of 15-fold  
109       cross-validation, and the dataset was split into 70:30 for training and testing.

110 To evaluate the performance of the predictive models, a range of metrics including  
 111 balanced accuracy, precision, recall, and F1 score were evaluated. Precision indicated  
 112 how many predicted positive cases are positive, while recall showed how the model  
 113 correctly identified actual positives. The F1 score is the combined means of precision and  
 114 recall, providing a single number that balances both metrics. Balanced accuracy considers  
 115 the imbalance in the classes of the dataset and is calculated by averaging sensitivity and  
 116 specificity, where sensitivity measures the proportion of actual positive cases that were  
 117 correctly identified as positive by the model, while specificity measures the proportion of  
 118 actual negative cases that were correctly identified as negative by the model.

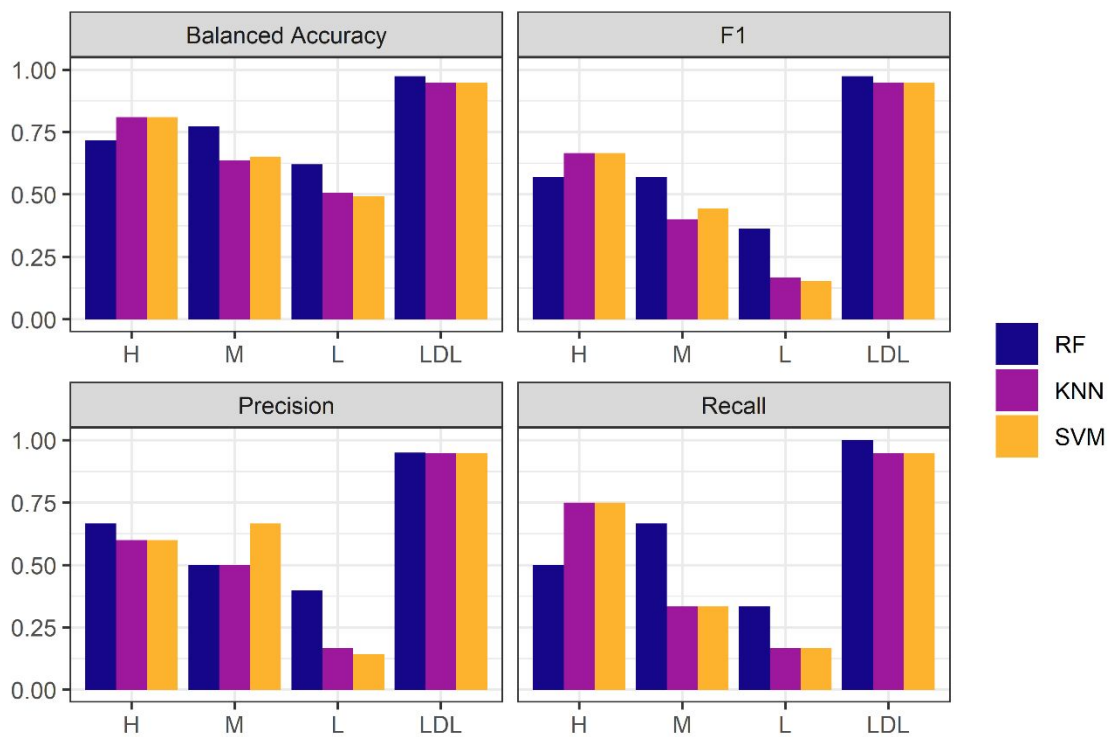

119  
 120 *Figure S7: Comparison of performance metrics for three ML models. The bar chart*  
 121 *shows the balanced accuracy, precision, recall, and F1 score for the RF, KNN, and SVM*  
 122 *models.*

123 The results demonstrate that RF had the highest predicted accuracy of 74.36%, followed  
 124 by KNN and SVM with 69.23% each for the classification of *E. coli* concentration

125 ranges. Figure S7 illustrates that for the LDL range, all three models achieved a balanced  
126 accuracy of nearly 100%, while the L range had the lowest balanced accuracy of only  
127 around 50%, with SVM having the lowest accuracy of 49.24%. In the H and M range  
128 prediction, the balanced accuracy ranged from 65% to 80%, with KNN and SVM  
129 demonstrating slightly better predictions in the H range, while RF had slightly better  
130 predictions in the L range. Compared to the regression model, the classification model  
131 appeared to predict the presence of *E. coli* more effectively. Although it cannot provide  
132 exact values like the regression model, the classification model significantly improved  
133 the accuracy of predicting *E. coli*, thus making it feasible to use the constructed soft  
134 sensor to detect the concentration range of *E. coli*.

## 135 **A.7. Reference**

136 (1) Kuhn, M. Building Predictive Models in R Using the Caret Package. *J. Stat.*  
137 *Softw.* **2008**, *28*, 1–26. <https://doi.org/10.18637/jss.v028.i05>.

138
